# Supplementary material for: Therapeutic potential of mesenchymal stem cells and their exosomes in severe novel coronavirus disease 2019 (COVID-19) cases
Source: Inflamm Regen. 2020 Jun 22;40:14. doi: 10.1186/s41232-020-00121-y (PMC7306412; doi:10.1186/s41232-020-00121-y)
Supplement: Supplementary file 1 — Additional file 1: Table S1. Clinical trials using mesenchymal stem cells (MSCs) and exosomes and registered on ClinicalTrials.gov. [file 41232_2020_121_MOESM1_ESM.xlsx]

## Sheet: Sheet1
				No.	NCT number	Title	Locations	Study start date	Cell source	Autologous/allogeneic	Administration route	Number of cells infused	Criteria	Age	Combination therapy	Number of patients	Follow-up period	Study type	Phase	Result	Reference	Primary Purpose
Examined by the key words; "COVID" and "Mesenchymal"				1	4348461	Battle against COVID-19 using mesenchymal stromal cells	Instituto de Investigación Sanitaria de la Fundación Jiménez Díaz, Spain	2020-04-06	Adipose tissue	allogeneic	intravenous injection	1.5 ×106 cells/kg×2 times	Confirmation of COVID-19 by RT-PCR. Respiratory failure requiring intubation and connection to mechanical ventilation. Criteria for acute respiratory distress: acute bilateral alveolar-interstitial infiltrate not compatible with left ventricular failure, sudden onset, and blood gas compromise with a PaO2/FiO2 <200mmHg.	over 18 years old	n.a.	100 participants	5 months	Interventional clinical trial	phase 2	not yet	n.a.	Treatment
				2	4315987	Mesenchymal stem cell to treat patients with severe COVID-19 pneumonia.	Hospital Vera Cruz Campina Grande, São Paulo, Brazil	2020-03-20	n.a.	n.a.	intravenous injection	2.0×107 cells	Present a confirmed or pending diagnosis of COVID-19, but with tomographic and clinical signs strongly suggestive of COVID-19, with pulmonary impairment greater than or equal to 50% and : 1) SpO2 < 95%, 2) CURB-65 > 4.	over 18 years old	n.a.	66 participants	3 months	Interventional clinical trial	phase 1	not yet	n.a.	Treatment
				3	4352803	Adipose mesenchymal cells for abatement of SARS-CoV-2 respiratory compromise in COVID-19 disease	Regeneris Medical, United States	2020-04-20	Adipose tissue	autologous	intravenous injection	0.5 ×105 cells/kg	COVID-19 diagnosis confirmed.	18 to 90 years old	n.a.	20 participants	6 years	Interventional clinical trial	phase 1	not yet	n.a.	Treatment
				4	4252118	Mesenchymal stem cell treatment for pneumonia patients infected with COVID-19.	Beijing 302 Military Hospital of China Beijing, China	2020-01-27	n.a.	n.a.	intravenous injection	3.0×107 cells	Confirmed COVID 19 by RT-PCR and Pneumonia that is judged by chest radiograph or CT.	18 to 70 years old	n.a.	20 participants	1 year	Interventional clinical trial	phase 1	not yet	n.a.	Treatment
				5	4345601	Mesenchymal stromal cells for the treatment of SARS-CoV-2 induced acute respiratory failure (COVID-19 disease).	Houston Methodist Hospital Houston, Texas, United States	2020-04-14	Bone marrow	allogeneic	intravenous injection	1.0×108 cells	Confirmed COVID 19 by RT-PCR. Respiratory distress or mild ARDS as evidenced by at least one of the following criteria: 1) RR ≧25/min, 2) SpO2 ≦92%, 3) 200< PaO2/FiO2 ≦300mmHg.	over 18 years old	n.a.	30 participants	2 years	Interventional clinical trial	phase 1	not yet	n.a.	Treatment
				6	4313322	Treatment of COVID-19 patients using Whartons Jelly-mesenchymal stem cells	Stem Cells Arabia Amman, Jordan	2020-03-16	Umbilical cord	allogeneic	intravenous injection	n.a.	COVID-19 positive diagnosis.	over 18 years old	n.a.	5 participants	6 months	Interventional clinical trial	phase 1	not yet	n.a.	Treatment
				7	4288102	Treatment with mesenchymal stem cells for severe corona virus disease 2019 (COVID-19).	Maternal and Child Hospital of Hubei Province Wuhan, Hubei, Wuhan Huoshenshan Hospital Wuhan, Hubei, China	2020-04-05	n.a.	n.a.	intravenous injection	4.0×107 cells×3 times	Confirmed COVID 19 by RT-PCR. In accordance with any one of the following : 1) RR ≧30/min, 2) SpO2 ≦93%, 3) 200< PaO2/FiO2 ≦300mmHg. 4) pulmonary imaging shows that the focus progress >50% in 24-48 hours.	18 to 75 years old	n.a.	90 participants	4 months	Interventional clinical trial	phase 2	not yet	n.a.	Treatment
				8	4346368	Bone marrow-derived mesenchymal stem cell treatment for sebere patients with corona virus disease 2019 (COVID-19).	Guangzhou Institute of Respiratory Health, The First Affiliated Hospital of Guangzhou Medical University Guangzhou, Guangdong, China	2020-04-15	Bone marrow	n.a.	intravenous injection	1.0 ×106 cells/kg	Confirmed COVID-19. Clinical classification is severe case: Meet any of the following: 1) RR ≧30/min, 2) SpO2 ≦93%, 3) PaO2/FiO2 ≦300mmHg.	18 to 75 years old	n.a.	20 participants	8 months	Interventional clinical trial	phase 1	not yet	n.a.	Treatment
				9	4336254	Safety and efficacy study of allogenic human dental pulp mesenchymal stem cells to treat severe COVID-19 patients.	Renmin Hospital of Wuhan University (East Campus) Wuhan, Hubei, China	2020-04-06	Dental pulp	allogeneic	intravenous injection	3.0×107 cells	Diagnosed with severe pneumonia of COVID: respiratory distress, RR ≧30/min, SpO2 ≦93%, PaO2/FiO2 ≦300mmHg; SARS-CoV-2 nucleic acid test was positive.	18 to 65 years old	n.a.	20 participants	8 months	Interventional clinical trial	phase 1	not yet	n.a.	Treatment
				10	4273646	Study of human umbilical cord mesenchymal stem cells in the treatment of severe COVID-19.	Union Hospital, Tongji Medical College, Huazhong University of Science and Technology Wuhan, Hubei, China	2020-04-20	Umbilical cord	allogeneic	intravenous injection	0.5 ×106 cells/kg×4 times	Confirmed COVID-19. It is severe if it meets any of the following: 1) RR ≧30/min, 2) SpO2 ≦93%, 3) PaO2/FiO2 ≦300mmHg.	18 to 65 years old	n.a.	48 participants	5 months	Interventional clinical trial	n.a.	not yet	n.a.	Treatment
				11	4302519	Novel coronavirus induced severe pneumonia treated by dental pulp mesenchymal stem cells	CAR-T Biotechnology Co, China.	2020-04-05	Dental pulp	allogeneic	intravenous injection	1.0×106 cells/kg	Severe patients meet any of the following: 1) RR >30/min, 2) SpO2 <93%, 3) PaO2/FiO2 <300mmHg.	18 to 75 years old	n.a.	24 participants	4 months	Interventional clinical trial	Phase 1	not yet	n.a.	Treatment
				12	4339660	Clinical Research of Human Mesenchymal Stem Cells in the Treatment of COVID-19 Pneumonia	Puren Hospital Affiliated to Wuhan University of Science and Technology Wuhan, Hubei, China	2020-02-01	Umbilical cord	allogeneic	intravenous injection	1.0×106 cells/kg	Confirmed COVID 19 by RT-PCR. In compliance with the 2019-nCoV pneumonia diagnosis: 1) RR ≧30/min, difficulty breathing, cyanosis of the lips, 2) SpO2 ≦93%, 3) PaO2/FiO2 ≦300mmHg.	18 to 75 years old	n.a.	30 participants	4 months	Interventional clinical trial	Phase 1&2	not yet	n.a.	Treatment
				13	4355728	Use of UC-MSCs for COVID-19 Patients	Diabetes Research Institute, University of Miami Miller School of Medicine Miami, Florida, United States	2020-04-17	Umbilical cord	allogeneic	intravenous injection	1.0×108 cells×2 times	Acute onset of a need for positive pressure ventilation by an endotracheal or tracheal tube with a PaO2/FiO2 <300mmHg with at least 5 cm H2O PEEP.	over 18 years old	n.a.	24 participants	1 year	Interventional clinical trial	Phase 1&2	not yet	n.a.	Treatment
				14	4293692	Therapy for Pneumonia Patients iInfected by 2019 Novel Coronavirus	Puren Hospital Affiliated to Wuhan University of Science and Technology Wuhan, Hubei, China	2020-02-24	Umbilical cord	allogeneic	intravenous injection	0.5 ×106 cells/kg×4 times	Confirmed COVID 19 by RT-PCR. In compliance with the 2019-nCoV pneumonia diagnosis: 1) RR ≧30/min, difficulty breathing, cyanosis of the lips, 2) SpO2 ≦93%, 3) PaO2/FiO2 ≦300mmHg.	18 to 75 years old	n.a.	0 participants	0 months	Interventional clinical trial	n.a.	not yet	n.a.	Treatment
				15	4362189	Efficacy and Safety Study of Allogeneic HB-adMSCs for the Treatment of COVID-19	River Oaks Hospital and Clinics Houston, Texas, United States	2020-05-15	Adipose tissue	allogeneic	intravenous injection	1.0×108 cells×4 times	Patient is hospitalized due to suspected COVID-19 infection.	over 18 years old	n.a.	110 participants	5 months	Interventional clinical trial	Phase 2	not yet	n.a.	Treatment
				16	4361942	Treatment of Severe COVID-19 Pneumonia With Allogeneic Mesenchymal Stromal Cells (COVID_MSV) (COVID_MSV)	Hospital Universitario Rio Hortega Valladolid, Spain	2020-04-24	n.a.	allogeneic	intravenous injection	1.0×106 cells/kg	Admitted to the Intensive Care Unit with pneumonia by COVID-19 infection in the last 48 hours, that meet at least one of these criteria: 1) Respiratory distress, 2) RR ≧30/min, 3) SpO2 ≦93%, 4) PaO2/FiO2 ≦300mmHg.	over 18 years old	n.a.	24 participants	8 months	Interventional clinical trial	Phase 2	not yet	n.a.	Treatment
				17	3042143	Repair of Acute Respiratory Distress Syndrome by Stromal Cell Administration (REALIST) (COVID-19) (REALIST)	Belfast Health and Social Care Trust, Royal Hospitals Belfast, Northern Ireland, United Kingdom	2019-01-07	Umbilical cord	allogeneic	intravenous injection	4.0×108 cells	COVID-19 based on clinical diagnosis or PCR result. ARDS as defined by the Berlin definition. Patient is receiving invasive mechanical ventilation.	over 16 years old	n.a.	75 participants	3 years	Interventional clinical trial	Phase 1&2	not yet	n.a.	Treatment
				18	4269525	Umbilical Cord(UC)-Derived Mesenchymal Stem Cells(MSCs) Treatment for the 2019-novel Coronavirus(nCOV) Pneumonia	Zhongnan Hospital of Wuhan University Wuhan, Hubei, China	2020-02-06	Umbilical cord	allogeneic	intravenous injection	3.3×107 cells×4 times	According to Diagnosis and Clinical Management of Pneumonia caused by 2019-nCoV infection, patients are diagnosed with severe or critical 2019-nCoV pneumonia with stay in the ICU of less than 48 hours. SOFA score between 2-13 point.	18 to 75 years old	n.a.	10 participants	7 months	Interventional clinical trial	Phase 2	not yet	n.a.	Treatment
				19	4333368	Cell Therapy Using Umbilical Cord-derived Mesenchymal Stromal Cells in SARS-CoV-2-related ARDS (STROMA-CoV2)	Hôpital Pitié-Salpêtrière - APHP, Hôpital Européen Georges Pompidou - APHP Paris, France	2020-04-01	Umbilical cord	allogeneic	intravenous injection	1.0×106 cells/kg	Confirmed COVID 19 by RT-PCR. Diagnosis of ARDS according to the Berlin definition of ARDS. Onset of ARDS <96 hours.	over 18 years old	n.a.	60 participants	1 year	Interventional clinical trial	Phase 1&2	not yet	n.a.	Treatment
				20	4341610	ASC Therapy for Patients With Severe Respiratory COVID-19 (ASC COVID-19)	Department of Cardiology, The Heart Centre, University Hospital Rigshospitalet Copenhagen, Denmark	2020-04-20	Adipose tissue	allogeneic	intravenous injection	1.0×108 cells	Temperature above 38.0℃. Pulmonary symptoms and signs, at least one of the following before clinical decision for intubation and respirator treatment: 1) Respiratory distress, RR ≧30/min, 2) SpO2 ≦93%, 3) PaO2/FiO2 ≦300mmHg. In respirator and possible for treatment within the first 24 hours.	18 to 80 years old	n.a.	40 participants	1 year	Interventional clinical trial	Phase 1&2	not yet	n.a.	Treatment
				21	4366323	Clinical Trial to Assess the Safety and Efficacy of Intravenous Administration of Allogeneic Adult Mesenchymal Stem Cells of Expanded Adipose Tissue in Patients With Severe Pneumonia Due to COVID-19	n.a.	2020-04-28	Adipose tissue	allogeneic	n.a.	0.8×108 cells	Clinical diagnosis of Pneumonia, severe or critical, caused by COVID-19 infection	18 to 80 years old	n.a.	26 participants	18 months	Interventional clinical trial	Phase 1&2	not yet	n.a.	Treatment
				22	4371601	Safety and Effectiveness of Mesenchymal Stem Cells in the Treatment of Pneumonia of Coronavirus Disease 2019	Fuzhou General Hospital, China	2020-05-01	Umbilical cord	allogeneic	intravenous injection	1.0×106 cells/kg	Patients with severe COVID-19 pneumonia	18 to 70 years old	n.a.	60 participants	18 months	Interventional clinical trial	Phase 1	not yet	n.a.	Treatment
				23	4366063	Mesenchymal Stem Cell Therapy for SARS-CoV-2-related Acute Respiratory Distress Syndrome	Royan Institute Tehran, Iran	2020-04-28	n.a.	n.a.	intravenous injection	1.0×106 cells/kg	Confirmation of COVID-19 pneumonia by RT-PCR	18 to 65 years old	n.a.	60 participants	6 months	Interventional clinical trial	Phase 2&3	not yet	n.a.	Treatment
				24	4382547	Treatment of Covid-19 Associated Pneumonia With Allogenic Pooled Olfactory Mucosa-derived Mesenchymal Stem Cells	University of Miami Miller School of Medicine, USA	2020-04-21	Umbilical cord	allogeneic	intravenous injection	1.0×108 cells	Patients with severe COVID-19 pneumonia	over 18 years old	n.a.	24 participants	1 year	Interventional clinical trial	Phase 1&2	not yet	n.a.	Treatment
				25	4366271	Clinical Trial of Allogeneic Mesenchymal Cells From Umbilical Cord Tissue in Patients With COVID-19	Hospital Universitario de Getafe, Spain	2020-04-28	Umbilical cord	allogeneic	n.a.	n.a.	Patients with severe COVID-19 pneumonia	40 to 80 years old	n.a.	106 participants	1 year	Interventional clinical trial	Phase 2	not yet	n.a.	Treatment
				26	4390152	Safety and Efficacy of Intravenous Wharton's Jelly Derived Mesenchymal Stem Cells in Acute Respiratory Distress Syndrome Due to COVID 19	Clinical Somer Rionegro, Colombia	2020-05-15	n.a.	n.a.	intravenous injection	5.0×106 cells	Confirmation of COVID-19 pneumonia by RT-PCR	18 to 80 years old	n.a.	40 participants	1 year	Interventional clinical trial	Phase 1&2	not yet	n.a.	Treatment
				27	4377334	Mesenchymal Stem Cells (MSCs) in Inflammation-Resolution Programs of Coronavirus Disease 2019 (COVID-19) Induced Acute Respiratory Distress Syndrome (ARDS)	University Hospital Tuebingen, Tuebingen, Germany	2020-05-06	Bone marrow	allogeneic	intravenous injection	n.a.	COVID-19-positive subject. Horowitz index ≤ 200, Bilateral opacities on frontal chest radiograph, and requirement for positive pressure ventilation via an endotracheal tube or non-invasive ventilation, no clinical signs of left atrial hypertension detected via echocardiography, or if measured, a Pulmonary Arterial Wedge Pressure (PAOP) less than or equal to 18 mmHg.	over 18 Years old	n.a.	40 participants	9 months	Interventional clinical trial	Phase 2	not yet	n.a.	Treatment
				28	4390139	Efficacy and Safety Evaluation of Mesenchymal Stem Cells for the Treatment of Patients With Respiratory Distress Due to COVID-19	Hospital de Bellvitge, Hospitalet de Llobregat, Barcelona, Spain	2020-05-15	Umbilical cord	allogeneic	intravenous injection	1.0×106 cells/kg×2 times	Positive PCR fpr SARS-CoV-2. Intensive Care Unit admission for less than 3 days, Moderate acute respiratory distress (Berlin criteria definition with 100 mmHg < PaO2/FiO2 ≤ 200 mmHg).	18 Years to 75 Years	n.a.	30 participants	7 months	Interventional clinical trial	Phase 1&2	not yet	n.a.	Treatment
				29	4392778	Clinical Use of Stem Cells for the Treatment of Covid-19	Istinye University, Istanbul, Turkey	2020-04-01	n.a.	n.a.	intravenous injection	3.0×106 cells/kg×3 times	Confirmed 2019-nCoV infection with RT-PCR Laboratory test. Confirmed Pneumonia with chest radiography and computer tomography, and any of the following criteria: Shortness of breath (RR ≥30/min), Resting finger oxygen saturation 93%, Arterial oxygen partial pressure (PaO2)/oxygen absorption concentration (FiO2) ≤ 300MMHG, Advancing of focus in Pulmonary imaging to >50% in 24-48 hours.	40 Years to 60 Years	n.a.	30 participants	5 months	Interventional clinical trial	Phase 1&2	not yet	n.a.	Treatment
				30	4397796	Study of the Safety of Therapeutic Tx With Immunomodulatory MSC in Adults With COVID-19 Infection Requiring Mechanical Ventilation	NantKwest, Inc.	2020-05-21	Bone marrow	allogeneic	intravenous injection	n.a.	Has laboratory-confirmed positive novel coronavirus (SARS-CoV-2) test, as determined by polymerase chain reaction (PCR). Requiring mechanical ventilatory support with moderate to severe Acute Respiratory Distress Syndrome (ARDS) as determined by the Berlin criteria.	18 Years to 80 Years	n.a.	45 participants	1 year	Interventional clinical trial	Phase 1	not yet	n.a.	Treatment
				31	4371393	MSCs in COVID-19 ARDS	University of Southern California, Los Angeles, California, United States	2020-05-01	Bone marrow	allogeneic	intravenous injection	2.0×106 cells/kg×2 times	Patient has coronavirus disease COVID-19 confirmed by real-time reverse transcription polymerase chain reaction (RT-PCR). Patient requiring mechanical ventilatory support with moderate to severe ARDS as determined by the adapted Berlin criteria.	over 18 Years old	n.a.	300 participants	2 years	Interventional clinical trial	Phase 3	not yet	n.a.	Treatment
				32	4398303	ACT-20 in Patients With Severe COVID-19 Pneumonia	Aspire Health Science	2020-05-21	Umbilical cord	allogeneic	intravenous injection	1.0×106 cells/kg	Confirmed positive test for COVID-19 by standard reverse transcriptase polymerase chain reaction (RT-PCR). On mechanical ventilation (n=35), or high-flow O2 support (n=35).	18 Years to 85 Years	n.a.	70 participants	5 months	Interventional clinical trial	Phase 1&2	not yet	n.a.	Treatment
				33	4400032	Cellular Immuno-Therapy for COVID-19 Acute Respiratory Distress Syndrome - Vanguard	The Ottawa Hospital, Ottawa, Ontario, Canada	2020-05-25	Bone marrow	allogeneic	intravenous injection	2.5 or 5.0×107 cells×3 times	Laboratory-confirmed SARS-CoV-2 infection. On invasive mechanical ventilation ≤48h. ARDS as per the international consensus definition35 (P/F ratio < 300 on FiO2≥0.5, with PEEP ≥5cm H2O).	over 18 Years old	n.a.	9 participants	1 year	Interventional clinical trial	Phase 1	not yet	n.a.	Treatment
Examined by the key words; "COVID" and "Exosome"
				1	4276987	A Pilot Clinical Study on Inhalation of Mesenchymal Stem Cells Exosomes Treating Severe Novel Coronavirus Pneumonia	Ruijin Hospital, China	2020-02-15	Adipose M+J2:J38esenchymal Stem Cells	Allogeneic	aerosol inhalation	2.0×108 nano vesicles×5 times	Severe, comply with any of the following: 1) RR ≧30/min, 2) SpO2 ≦93%, 3) PaO2/FiO2 ≦300mmHg. Critical, comply with any of the following: 1) Respiratory failure, and requirement for mechanical ventilation, 2) Shock, 3) Other organ failure and requirement for ICU monitoring.	18 to 75 years old	n.a.	30 participants	5 months	Interventional clinical trial	Phase 1	not yet	n.a.	Treatment
